# Supplementary material
Source: Springer Nature journal article supplement (https://www.springermedizin.de/resource/supplementary/12885_2009_1679_MOESM2_ESM.pdf/9472650)

(a)

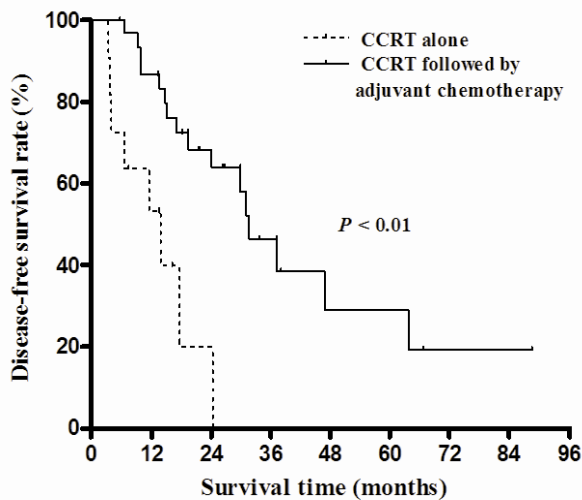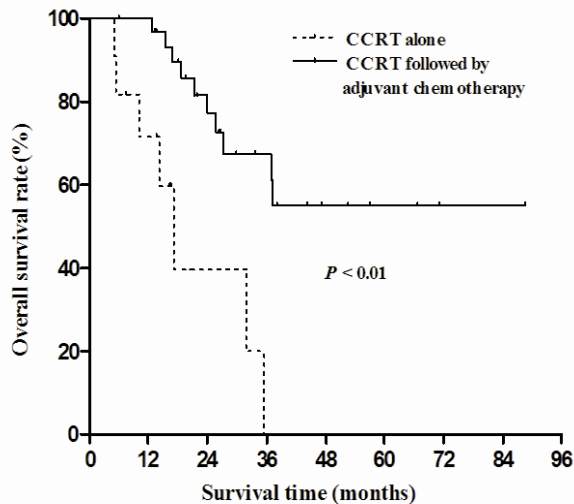

(b)

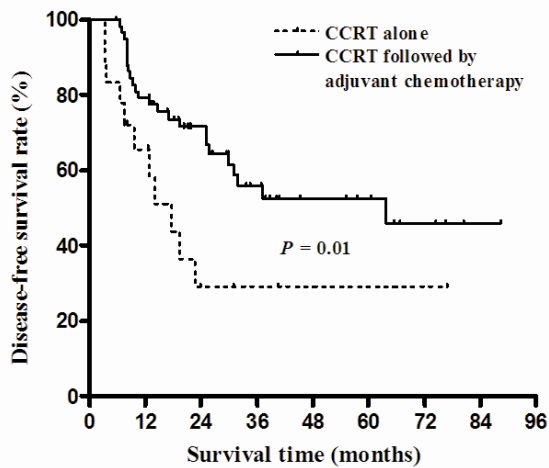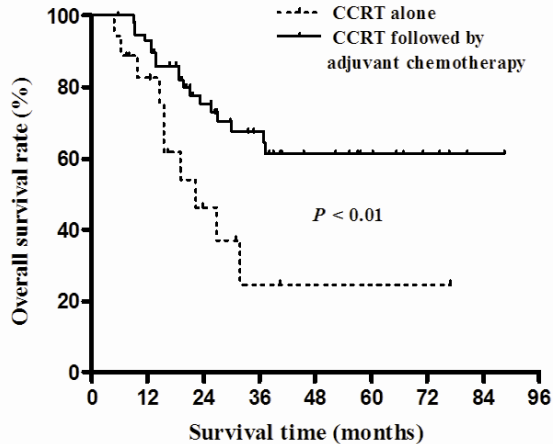

Supplement: MOESM2 [file 9472650]
